# Supplementary material
Source: PubMed Central journal article supplement (PMC1851828)
Supplement: plntphys_pp.107.096057_1.pdf [file plntphys_pp.107.096057_1.pdf]

## Supplementary dataset 1: TAGGIT Microsoft Excel© macro.

-----  
' TAGGIT Macro  
'  
' (c) Simon Holdsworth 2005, 2006  
'  
' This macro is free software; you can redistribute it and/or modify  
' it as you please, but you must include this header in any distributed or  
' modified version.  
'  
' Any useful additions to the macro should be submitted to the author.  
'  
' This package is distributed in the hope that it will be useful,  
' but WITHOUT ANY WARRANTY; without even the implied warranty of  
' MERCHANTABILITY or FITNESS FOR A PARTICULAR PURPOSE.  
'  
' Bug fixes, suggestions and comments should be sent to: hldswrth@hotmail.com  
'

-----  
' Instructions:

' Tag a list given a set of tags. The search list may consist of one  
' or more columns. The tags are searched for within each of the columns in  
' turn. The first matching tag is placed in the next column after the search  
' list.

' The macro also calculates the tag hit rate, and places a summary at the  
' specified location.

' The currently selected cell and those to the right contain the parameters  
' for the macro:

' Cell of 1st entry in search list  
' Cell of 1st entry in tag list  
' Cell of 1st entry in tag hit rate report (empty for no report)  
' Number of columns in the search list  
' Tags and corresponding search terms in rows 'R' or columns 'C'.

-----  
' Updates:

' v7: 13/03/2006: Added search columns parameter to allow for more than two columns.  
' v7(1): 27/07/2006: Added ability to have tags/search terms in columns or rows.  
'

-----  
' Main subroutine.  
' Gets the parameters from the currently selected cell.  
Sub Taggit()

'On Error GoTo errorHandler

Dim paramCell As Range  
Dim listCell As Range  
Dim listRange As Range  
Dim tagCell As Range

```

Dim tagRange As Range
Dim hitRateCell As Range
Dim generateHitRate As Boolean
Dim searchColumns As Integer
Dim tagsAndTermsInColumns As Boolean

' Check that parameters are supplied.
' Assume that these are in the currently selected cell
' and those to the right.
Set paramCell = ActiveCell
If paramCell.Value = "" Or _
    paramCell.Offset(0, 1).Value = "" Then
    MsgBox "Error: current cell or the one to the right is empty"
    Exit Sub
End If

' Get parameter values.
Set listCell = Range(paramCell.Value)
Set tagCell = Range(paramCell.Offset(0, 1).Value)

If paramCell.Offset(0, 2).Value <> "" Then
    Set hitRateCell = Range(paramCell.Offset(0, 2).Value)
    generateHitRate = True
End If

searchColumns = 2
If paramCell.Offset(0, 3).Value <> "" Then
    searchColumns = Int(Val(paramCell.Offset(0, 3).Value))
End If

tagsAndTermsInColumns = True
If paramCell.Offset(0, 4).Value = "R" Then
    tagsAndTermsInColumns = False
End If

Set listRange = Range(listCell, listCell.Offset(-1, 0).End(xlDown))

' Tag range depends on whether tags and search terms are in rows or columns.
If tagsAndTermsInColumns Then
    Set tagRange = Range(tagCell, tagCell.Offset(0, -1).End(xlToRight))
Else
    Set tagRange = Range(tagCell, tagCell.Offset(-1, 0).End(xlDown))
End If

' Generate the tags and hit rate.
TagList listRange, tagRange, hitRateCell, generateHitRate, searchColumns, _
    tagsAndTermsInColumns

Exit Sub

errorHandler:
    MsgBox "Error: did you make sure that the right sheet was active?"

End Sub

' Tag the given list and generate the hit rates if required.
Sub TagList(listRange As Range, _
    tagsRange As Range, _
    rateCell As Range, _
    generateRate As Boolean, _

```

```

        searchColumns As Integer, _
        tagsAndTermsInColumns As Boolean)

' Determine the number of tags, and create an array of
' collections to hold the search terms.
Dim numTags As Integer
If tagsAndTermsInColumns Then
    numTags = tagsRange.Columns.Count
Else
    numTags = tagsRange.Rows.Count
End If

ReDim searchTerms(0 To numTags) As Collection
ReDim tags(0 To numTags) As String

' Read in the tags and search terms.
ReadTagsAndSearchTerms tagsRange, tags, searchTerms, numTags, tagsAndTermsInColumns

' Initialize the hit rate calculation
If generateRate Then
    InitializeHitRate rateCell, listRange.Rows.Count, tags, numTags
End If

' Tag the list
TagUsingSearchTerms listRange, tags, searchTerms, numTags, rateCell, generateRate,
searchColumns

End Sub

' Read in the tags and search terms.
Sub ReadTagsAndSearchTerms(tagsRange As Range, _
    tags, _
    searchTerms, _
    numTags As Integer, _
    tagsAndTermsInColumns As Boolean)

    ReDim Preserve searchTerms(0 To numTags) As Collection
    ReDim Preserve tags(0 To numTags) As String

    xOffset = 0
    yOffset = 0
    If tagsAndTermsInColumns Then
        xOffset = 1
    Else
        yOffset = 1
    End If

    ' Go through the tags range pulling out the tag name and
    ' search terms.
    Dim tagNumber As Integer
    tagNumber = 0
    Dim terms As Collection

    For Each Cell In tagsRange.Cells
        tags(tagNumber) = Cell.Value

        Set terms = New Collection
        Set Cell = Cell.Offset(xOffset, yOffset)

        ' Store each search term.

```

```

While Cell.Value <> ""

    ' Adjust the search term so that we can just look for
    ' it in an entry.
    term = Trim(Cell.Value)

    ' For now, strip off wildcards
    'If Right(term, 1) = "*" Then term = Left(term, Len(term) - 1)
    'If Left(term, 1) = "*" Then term = Right(term, Len(term) - 1)

    ' Check for a wildcard at the end.
    ' If no wildcard, add a space to force a complete word.
    If Right(term, 1) = "*" Then
        term = Left(term, Len(term) - 1)
    Else
        term = term & " "
    End If

    ' Check for a wildcard at the start.
    ' If no wildcard, add a space to force a complete word.
    If Left(term, 1) = "*" Then
        term = Right(term, Len(term) - 1)
    Else
        term = " " & term
    End If

    ' Lower case the search term.
    term = LCase(term)

    ' MsgBox "Adding search term '" & term & "' from value '" & Cell.Value & "'"

    terms.Add term
    Set Cell = Cell.Offset(xOffset, yOffset)
Wend

' Store the set of search terms.
Set searchTerms(tagNumber) = terms

' Look for the next tag.
tagNumber = tagNumber + 1
Next

End Sub

' Read in the tags and search terms.
Sub TagUsingSearchTerms(listRange As Range, _
    tags, _
    searchTerms, _
    numTags As Integer, _
    rateCell As Range, _
    generateRate As Boolean, _
    searchColumns As Integer)

    ReDim Preserve searchTerms(0 To numTags) As Collection
    ReDim Preserve tags(0 To numTags) As String
    Dim columnsSearched As Integer

    ' Set the Tags heading.
    listRange.Rows(0).Offset(0, searchColumns).Value = "Tag"
    listRange.Rows(0).Offset(0, searchColumns).Font.Bold = True

```

```

' Go through each cell in the list.
For Each Cell In listRange.Cells

    ' Search each column in turn, starting with the leftmost.
    ' Stop as soon as a match has been found.
    columnsSearched = 0
    tagNumber = -1
    While tagNumber = -1 And columnsSearched < searchColumns
        tagNumber = FindFirstSearchTerm(Cell.Offset(0, columnsSearched).Value, numTags,
searchTerms)
        columnsSearched = columnsSearched + 1
    Wend

    ' If a tag was found, put the value in the end column.
    If tagNumber > -1 Then
        Cell.Offset(0, searchColumns).Value = tags(tagNumber)

        ' If generating hit rates, update the count for the tag.
        If generateRate Then
            rateValue = rateCell.Offset(tagNumber + 1, 1).Value
            If rateValue = "" Then
                rateCell.Offset(tagNumber + 1, 1).Value = 1
            Else
                rateCell.Offset(tagNumber + 1, 1).Value = Int(Val(rateValue)) + 1
            End If
        End If

        ' If not found, clear the cell.
    Else
        Cell.Offset(0, searchColumns).Value = ""
    End If
End If
Next

```

End Sub

```

' Find the first matching search term.
Function FindFirstSearchTerm(entry As String, _
    numTags As Integer, _
    searchTerms) As Integer

```

```

    ReDim Preserve searchTerms(0 To numTags) As Collection

```

```

    ' Add a space at the start and end of the entry, so that we don't
    ' have to special case hits at the ends.
    ' Also convert the entry into lower case so that we don't have to do
    ' a case-insensitive search, which is slower.
    ,

```

```

    searchEntry = " " & LCase(entry) & " "

```

```

    ' Go through the search terms for each tag.
    ' There is a MUCH faster way to do this by constructing a
    ' search tree from all the search terms, rather than hunting
    ' through all the lists - maybe I'll implement that next.
    For i = 0 To numTags - 1

```

```

        Dim terms As Collection
        Set terms = searchTerms(i)
        For Each term In terms

```

```

            ' If the term is found, then return this tag index.
            ' Use a "textual" compare, i.e. case insensitive.

```

```

        If InStr(1, searchEntry, term, vbBinaryCompare) > 0 Then
            FindFirstSearchTerm = i
            Exit Function
        End If
    Next
Next

' Return an indication that the term was not found
FindFirstSearchTerm = -1

End Function

' Initialize the hit rate summary.
Sub InitializeHitRate(hitCell As Range, _
    listSize As Integer, _
    tags, _
    numTags As Integer)

    ReDim Preserve tags(0 To numTags) As String

    ' Clear out the target.
    ' Clear out an extra 100 rows in case number of tags has reduced.
    Range(hitCell, hitCell.Offset(numTags + 104, 2)).Value = ""

    ' Initialise totals to zero.
    Range(hitCell.Offset(0, 1), hitCell.Offset(numTags, 1)).Value = 0

    ' Set up column titles.
    hitCell.Value = "Tags"
    hitCell.Font.Bold = True
    hitCell.Offset(0, 1).Value = "Count"
    hitCell.Offset(0, 1).Font.Bold = True

    ' Set up totals.
    hitCell.Offset(numTags + 1, 0).Value = "Unclassified"
    hitCell.Offset(numTags + 1, 1).Value = "=" & hitCell.Offset(numTags + 2, 1).Address & _
        "-" & hitCell.Offset(numTags + 3, 1).Address
    hitCell.Offset(numTags + 1, 0).Font.Bold = True
    hitCell.Offset(numTags + 1, 1).Font.Bold = True

    hitCell.Offset(numTags + 2, 0).Value = "Total genes in lists"
    hitCell.Offset(numTags + 2, 1).Value = listSize
    hitCell.Offset(numTags + 2, 0).Font.Bold = True
    hitCell.Offset(numTags + 2, 1).Font.Bold = True

    hitCell.Offset(numTags + 3, 0).Value = "Total genes classified above"
    hitCell.Offset(numTags + 3, 1).Value = "=SUM(" & _
        hitCell.Offset(1, 1).Address & ":" & _
        hitCell.Offset(numTags, 1).Address & ")"
    hitCell.Offset(numTags + 3, 0).Font.Bold = True
    hitCell.Offset(numTags + 3, 1).Font.Bold = True

    hitCell.Offset(numTags + 4, 0).Value = "Percentage classified"
    hitCell.Offset(numTags + 4, 1).Value = "=ROUND(" & hitCell.Offset(numTags + 3, 1).Address & _
        "/" & hitCell.Offset(numTags + 2, 1).Address & _
        " * 100,2)"
    hitCell.Offset(numTags + 4, 0).Font.Bold = True
    hitCell.Offset(numTags + 4, 1).Font.Bold = True

    ' Copy tag names.

```

```
For i = 0 To numTags - 1
    hitCell.Offset(i + 1).Value = tags(i)
Next
```

```
End Sub
```
