# Supplementary material
Source: PubMed Central journal article supplement (PMC1851828)
Supplement: plntphys_pp.107.096057_2.pdf [file plntphys_pp.107.096057_2.pdf]

**Supplementary data:**

**Supplementary Dataset 1:** TAGGIT Microsoft Excel© macro.

**Supplementary Table 1:** Detailed descriptions of differentially up-regulated genes in comparisons used in this paper. Derived from original datasets held at NASC (University of Nottingham) at: NASCarrays service <http://affymetrix.arabidopsis.info/narrays/experimentbrowse.pl>

**Supplementary Table 2:** Representative references associated with gene developmental stage classifications, AGI code and search strings used in conjunction with the TAGGIT macro, and TAIR6 annotations of genes.

**Supplementary Table 3:** Lists of genes related to comparison of *Ler* AR>*cts-1* S seed gene set with the Ogawa et al. (2003) gibberellin-induced gene set.

**Supplementary Table 4:** Lists of genes related to comparisons of Cvi AR and D seed samples (Cadman et al., 2006), and Col-0 germination time-course (Nakabayashi et al., 2005).
